would be an important step toward personalized blood transfusion. The meta-analysis by Hovaguimian and Myles.<sup>5</sup> has made important progress toward this goal.

### Competing Interests

The authors declare no competing interests.

**Yan Qiu, M.D., Changwei Chen, M.M., Lei Du, M.D.**  
Sichuan University, Chengdu, Sichuan, China (L.D.). dulei@scu.edu.cn

### References

1. Murphy GJ, Reeves BC, Rogers CA, Rizvi SI, Culliford L, Angelini GD: Increased mortality, postoperative morbidity, and cost after red blood cell transfusion in patients having cardiac surgery. *Circulation* 2007; 116:2544–52
2. Paone G, Likosky DS, Brewer R, Theurer PF, Bell GF, Cogan CM, Prager RL; Membership of the Michigan Society of Thoracic and Cardiovascular Surgeons: Transfusion of 1 and 2 units of red blood cells is associated with increased morbidity and mortality. *Ann Thorac Surg* 2014; 97:87–93; discussion 93–4
3. Hajjar LA, Vincent JL, Galas FR, Nakamura RE, Silva CM, Santos MH, Fukushima J, Kalil Filho R, Sierra DB, Lopes NH, Mauad T, Roquim AC, Sundin MR, Leão WC, Almeida JP, Pomerantzeff PM, Dallan LO, Jatene FB, Stolf NA, Auler JO Jr: Transfusion requirements after cardiac surgery: The TRACS randomized controlled trial. *JAMA* 2010; 304:1559–67
4. Murphy GJ, Pike K, Rogers CA, Wordsworth S, Stokes EA, Angelini GD, Reeves BC; TITRE2 Investigators: Liberal or restrictive transfusion after cardiac surgery. *N Engl J Med* 2015; 372:997–1008
5. Hovaguimian F, Myles PS: Restrictive *versus* liberal transfusion strategy in the perioperative and acute care settings: A context-specific systematic review and meta-analysis of randomized controlled trials. *ANESTHESIOLOGY* 2016; 125:46–61

(Accepted for publication December 9, 2016.)

### In Reply:

We would like to thank Drs. Warner, Qiu, and colleagues for their valuable inputs regarding our systematic review.<sup>1</sup>

Dr. Warner rightly points out that CIs crossing the equality line correspond to nonsignificant results and suggests that the wording of our findings may have failed to reflect this lack of statistical significance. Although we agree that “borderline” results (*i.e.*, where one end of the CI just overlaps the null value) should be interpreted with caution, it is worth to note that the Cochrane Collaboration discourages formulations such as “nonsignificant” or “not statistically significant,” since these terms are commonly misinterpreted as an indication that “the intervention has no effect.”<sup>2</sup> Although some authors would describe such findings as a “tendency” or a “trend” toward an effect, we opted for a more moderate wording (*i.e.*, using formulations such as “seemed to” or “possible increase”), as suggested elsewhere.<sup>3</sup> As for the interpretation of borderline findings, it might help to remember that the true effect is more likely to lie around the point estimate (*i.e.*, around the

risk ratio) than at the margins of the CI.<sup>3</sup> The traditionally significant  $P < 0.05$  may well be suitable for testing efficacy, but CIs rather than hypothesis testing are preferred when testing safety, equivalence, or noninferiority.<sup>4</sup>

A second concern of Dr. Warner’s is that our analysis did not include transfusion-related pulmonary complications, which may have resulted in an underestimation of potential harmful effects associated with liberal transfusion strategies. The rationale behind the exclusion of pulmonary complications was mainly related to the quality of the reported data in the original trials: in most studies, there was no distinction between transfusion-related events (such as acute lung injury or pulmonary edema due to circulatory overload) and events secondary to inadequate oxygen supply, such as left-sided heart failure due to myocardial infarction. Including outcomes with opposite etiologies could have resulted in a dilution of the intervention effects.

Qui *et al.* highlight a potential issue encountered in trials addressing transfusion strategies, *i.e.*, the fact that heterogeneity in hemoglobin levels within individual treatment groups may potentially dilute treatment effects. Their concern is based on the assumption that patients assigned to a restrictive strategy who received blood transfusions would eventually have the same (posttransfusion) hemoglobin levels as those from the liberal group. A similar issue may occur if some patients assigned to a restrictive strategy never developed anemia (*i.e.*, perioperative hemoglobin levels maintained in the range of the liberal group). This could indeed lead to an underestimation of adverse events, since only a small fraction of patients assigned to a restrictive strategy would truly be at risk of developing anemia-related complications. To address this potential source of heterogeneity, Qui *et al.* propose to stratify the analysis according to hemoglobin levels (see table 1, which provides a detailed description of hemoglobin levels across studies). Although the idea is very elegant, such exploratory analyses should be carried out with caution, since the quality of the reported data remains limited (data not extractable, heterogeneity in the frequency or duration of hemoglobin measurements, or use of inadequate statistics [*e.g.*, Student’s *t* test for data correlated over time]). It is also worth noting that the randomized design used in the original studies tends to protect from bias and residual confounding. We certainly agree that large, well-designed randomized controlled trials are still needed to fully explore the effects of transfusion strategies and eagerly await the results of the ongoing Transfusion Requirements in Cardiac Surgery-III trial (NCT 02042898).

### Competing Interests

The authors declare no competing interests.

**Frédérique Hovaguimian, M.D., M.Clin.Res.Meth., Paul S. Myles, M.B.B.S., M.P.H., M.D., F.C.A.I., F.A.N.Z.C.A., F.R.C.A., F.A.H.M.S.** Division of Anesthesiology, University Hospital of Zurich, Zurich, Switzerland (F.H.). frederique.hovaguimian@usz.ch

**Table 1.** Hemoglobin Levels across Studies

| Study ID                                                                                     | Study Characteristics                             |                            | Intervention Characteristics |                   |                              |             |         |                              | Hemoglobin Levels Differed Significantly Over Time? |                                                                          |     |
|----------------------------------------------------------------------------------------------|---------------------------------------------------|----------------------------|------------------------------|-------------------|------------------------------|-------------|---------|------------------------------|-----------------------------------------------------|--------------------------------------------------------------------------|-----|
|                                                                                              | Setting or Reason for Admission                   | Hemoglobin Threshold (g/l) | Restrictive                  | Liberal           | Mean Hemoglobin Levels (g/l) | Restrictive | Liberal | Corresponding Hematocrit (%) |                                                     | Mean Hemoglobin/Hematocrit Levels: Number of Measurements and Time Frame |     |
| Group 1: cardiovascular disease, cardiac/vascular surgery, or interventional catheterization |                                                   |                            |                              |                   |                              |             |         |                              |                                                     |                                                                          |     |
| Bracey 1999 <sup>47</sup>                                                                    | Elective cardiac (CABG)                           | 80                         | 80                           | 90                | NE                           | NE          | NE      | NE                           | —                                                   | No                                                                       |     |
| Bush 1997 <sup>48</sup>                                                                      | Elective vascular (aortic + infrainguinal)        | 90                         | 90                           | 100               | 98                           | 100         | 110     | 29.4                         | 33                                                  | 6 measurements during 48 h                                               | Yes |
| Carson 2013 <sup>6</sup>                                                                     | Interventional catheterization                    | S (80)                     | S (80)                       | 100               | 91                           | 106         | 106     | 28.4                         | 31.8                                                | Mean hemoglobin levels at day 3 POP                                      | Yes |
| Cooper 2011 <sup>51</sup>                                                                    | Interventional catheterization or cardiac surgery | 80                         | 80                           | 100               | 93                           | 102         | 102     | 27.9                         | 30.6                                                | Daily measurements during 14 d                                           | Yes |
| Hajjar 2010 <sup>55</sup>                                                                    | Elective cardiac (CABG, valve)                    | 80                         | 80                           | 100               | 91                           | 105         | 105     | 28.4                         | 31.8                                                | 6 measurements during 7 d                                                | Yes |
| Murphy 2015 <sup>60</sup>                                                                    | Elective cardiac (CABG, valve, aortic)            | 75                         | 75                           | 90                | NE                           | NE          | NE      | NE                           | NE                                                  | —                                                                        | Yes |
| Shehata 2012 <sup>66</sup>                                                                   | Elective cardiac (CABG, valve)                    | 70 IOP<br>75 POP           | 70 IOP<br>75 POP             | 95 IOP<br>100 POP | 91                           | 107         | 107     | 27.3                         | 32.1                                                | Daily measurements during 6 d                                            | Yes |
| Slight 2008 <sup>67</sup>                                                                    | Elective cardiac (CABG, valve)                    | RCV schema                 | RCV schema                   | 80–90             | 102                          | 102         | 102     | 30.6                         | 30.6                                                | Mean hemoglobin levels at day 6 POP                                      | No  |
| Group 2: elderly and orthopedic surgery                                                      |                                                   |                            |                              |                   |                              |             |         |                              |                                                     |                                                                          |     |
| Carson 1998 <sup>49</sup>                                                                    | Hip fracture                                      | S (80)                     | S (80)                       | 100               | 97                           | 107         | 107     | 29.1                         | 32.1                                                | Mean hemoglobin levels at discharge                                      | Yes |
| Carson 2011 <sup>50</sup>                                                                    | Hip fracture                                      | S (80)                     | S (80)                       | 100               | NE                           | NE          | NE      | NE                           | NE                                                  | —                                                                        | Yes |
| Fan 2014 <sup>52</sup>                                                                       | Elective lower limb joint replacement (hip)       | 80                         | 80                           | 100               | 87                           | 104         | 104     | 26.1                         | 31.2                                                | Mean hemoglobin levels at day 3 POP                                      | Yes |
| Foss 2009 <sup>8</sup>                                                                       | Hip fracture                                      | 80                         | 80                           | 100               | NE                           | NE          | NE      | NE                           | NE                                                  | —                                                                        | No  |
| Gregersen 2015 <sup>9</sup>                                                                  | Hip fracture                                      | 97                         | 97                           | 113               | 113                          | 122         | 122     | 33.9                         | 36.6                                                | 5 measurements during 30 d                                               | Yes |
| Grover 2006 <sup>54</sup>                                                                    | Elective lower limb joint replacement             | 80                         | 80                           | 100               | 99                           | 111         | 111     | 29.7                         | 33.3                                                | 4 measurements during 5 d                                                | Yes |
| Nielsen 2014 <sup>62</sup>                                                                   | Elective hip revision                             | 73                         | 73                           | 89                | 102                          | 99          | 99      | 30.6                         | 29.7                                                | Unclear                                                                  | No  |
| Parker 2013 <sup>63</sup>                                                                    | Hip fracture                                      | S                          | S                            | 100               | 112                          | 115         | 115     | 33.6                         | 34.5                                                | Mean hemoglobin levels at 6 wk                                           | NR  |
| So-Osman 2010 <sup>68</sup>                                                                  | Elective lower limb joint replacement             | Standardized schema        | Standardized schema          | Non standardized  | 114                          | 114         | 114     | 34.2                         | 34.2                                                | Mean hemoglobin levels at discharge                                      | No  |

(Continued)

Table 1. (Continued)

| Study ID                                                         | Setting or Reason for Admission           | Hemoglobin Threshold (g/l) |            | Mean Hemoglobin Levels (g/l) |         | Corresponding Hematocrit (%) |         | Mean Hemoglobin/Hematocrit Levels: Number of Measurements and Time Frame | Hemoglobin Levels Differed Significantly Over Time? |
|------------------------------------------------------------------|-------------------------------------------|----------------------------|------------|------------------------------|---------|------------------------------|---------|--------------------------------------------------------------------------|-----------------------------------------------------|
|                                                                  |                                           | Restrictive                | Liberal    | Restrictive                  | Liberal | Restrictive                  | Liberal |                                                                          |                                                     |
| Group 3: mixed medical/surgical cases and acute care             |                                           |                            |            |                              |         |                              |         |                                                                          |                                                     |
| de Almeida 2015 <sup>7</sup>                                     | Surveillance post major abdominal surgery | 70                         | 90         | NE                           | NE      | NE                           | NE      | —                                                                        | Yes                                                 |
| Fortune 1987 <sup>53</sup>                                       | Trauma or surgical bleeding               | 100*                       | 133*       | 101                          | 127     | 30.3                         | 38.1    | NR                                                                       | Yes                                                 |
| Hebert 1995 <sup>57</sup>                                        | Various diagnoses                         | 70–75                      | 100–105    | 90                           | 109     | 27                           | 32.7    | Daily measurements during ICU stay                                       | Yes                                                 |
| Hebert 1999 <sup>56</sup>                                        | Various diagnoses                         | 70                         | 100        | 85                           | 107     | 25.5                         | 32.1    | Daily measurements during ICU stay                                       | Yes                                                 |
| Holst 2014 <sup>58</sup>                                         | Septic shock                              | 70                         | 90         | NE                           | NE      | NE                           | NE      | —                                                                        | Yes                                                 |
| Jairath 2015 <sup>34</sup>                                       | Upper gastrointestinal bleeding           | 80                         | 100        | 115                          | 115     | 34.5                         | 34.5    | Mean hemoglobin levels during the entire study period                    | No                                                  |
| Markatou 2012 <sup>59</sup>                                      | Surveillance post major abdominal surgery | 77                         | 99         | NE                           | NE      | NE                           | NE      | —                                                                        | Yes                                                 |
| Topley 1956 <sup>69</sup>                                        | Trauma                                    | 70–80% of RCV              | Normal RCV | 113                          | 156     | 3.9                          | 46.8    | NR                                                                       | Yes                                                 |
| Villanueva 2013 <sup>70</sup>                                    | Upper gastrointestinal bleeding           | 70                         | 90         | 92                           | 101     | 27.6                         | 30.3    | Daily measurements during hospital stay                                  | Yes                                                 |
| Walsh 2013 <sup>35</sup>                                         | Various diagnoses                         | 70                         | 90         | 82                           | 96      | 24.6                         | 28.8    | Daily measurements during ICU stay (maximum 14 d)                        | Yes                                                 |
| Group 4: younger, fitter, and brain injury/intracranial bleeding |                                           |                            |            |                              |         |                              |         |                                                                          |                                                     |
| Naidech 2010 <sup>61</sup>                                       | Neuro-ICU                                 | 100                        | 115        | NE                           | NE      | NE                           | NE      | —                                                                        | Yes                                                 |
| Robertson 2014 <sup>65</sup>                                     | Neuro-ICU                                 | 70                         | 100        | 96                           | 112     | 28.8                         | 33.6    | Mean hemoglobin levels at day 16 post injury                             | Yes                                                 |
| Group 5: other patients and settings                             |                                           |                            |            |                              |         |                              |         |                                                                          |                                                     |
| Prick 2014 <sup>64</sup>                                         | Postpartum hemorrhage                     | S                          | 89         | 74                           | 90      | 22.2                         | 27      | Mean hemoglobin levels at discharge                                      | Yes                                                 |
| Webert 2008 <sup>71</sup>                                        | Hematologic cancer                        | 80                         | 120        | 93                           | 106     | 27.9                         | 31.8    | 12 measurements during 30 d                                              | Yes                                                 |

Variables in italic correspond to converted values using the following formula: hemoglobin [g/l] = hematocrit [%]/0.3.

CABG = coronary artery bypass graft; ICU = intensive care unit; IOP = intraoperative; NE = not extractable (graphs only, no numerical data); NR = not reported; POP = postoperative; RCV = red cell volume; S = symptoms of anemia.

## References

1. Hovaguimian F, Myles PS: Restrictive *versus* liberal transfusion strategy in the perioperative and acute care settings: A context-specific systematic review and meta-analysis of randomized controlled trials. *ANESTHESIOLOGY* 2016; 125:46–61
2. Schünemann H, Oxman A, Vist G, Higgins J, Deeks J, Glasziou P, Guyatt G: Chapter 12: Interpreting results and drawing conclusions, *Cochrane Handbook for Systematic Reviews of Interventions* Version 5.1.0 (updated March 2011). Edited by Higgins JPT, Green S. The Cochrane Collaboration. 2011. Available at: <http://www.cochrane-handbook.org>. Accessed September 20, 2016
3. Hackshaw A, Kirkwood A: Interpreting and reporting clinical trials with results of borderline significance. *BMJ* 2011; 343:d3340
4. U.S. Food and Drug Administration: Guidance for Industry: E9 Statistical Principles for Clinical Trials. 1998. Available at: <http://www.fda.gov/downloads/drugs/guidancecompliance-regulatoryinformation/guidances/ucm073137.pdf>. Accessed September 20, 2016

*(Accepted for publication October 20, 2016.)*
